# Supplementary material for: Sox7, Sox17, and Sox18 Cooperatively Regulate Vascular Development in the Mouse Retina
Source: PubMed Central journal article supplement (PMC4667919; doi:10.1371/journal.pone.0143650), 2015-12-02
Supplement: pone.0143650.s001.pdf [file pone.0143650.s001.pdf]

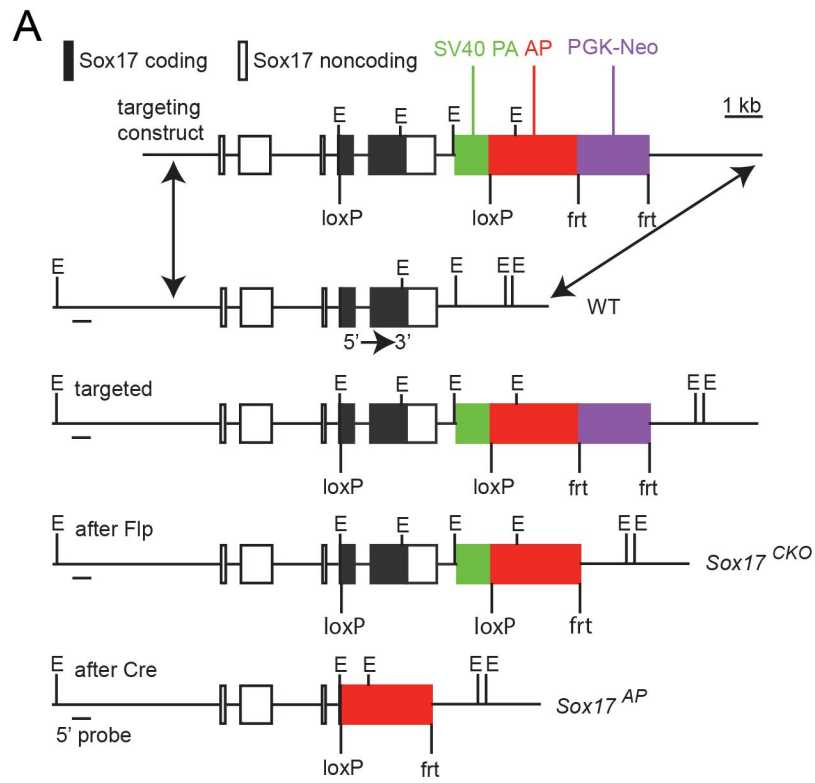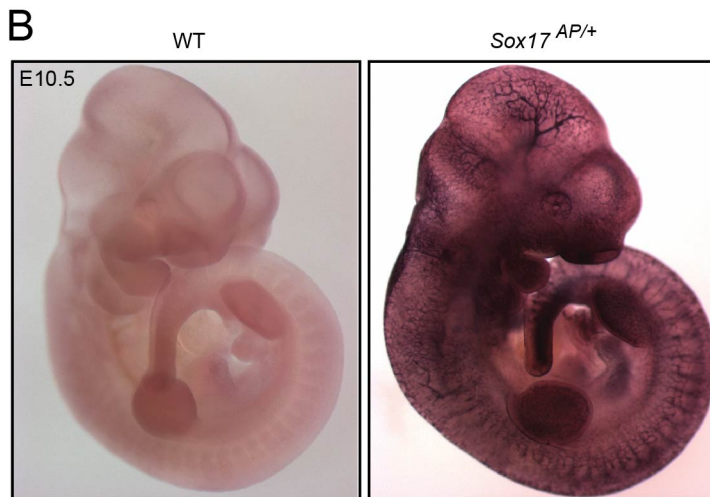

Zhou et al, Figure S1
