# Supplementary material for: Sox7, Sox17, and Sox18 Cooperatively Regulate Vascular Development in the Mouse Retina
Source: PubMed Central journal article supplement (PMC4667919; doi:10.1371/journal.pone.0143650), 2015-12-02

**A**

| Genotype of Parents                                                             | Genotype of Progeny                                      | Live | Total | Live/Total<br>Expected ratio | P-Value                |
|---------------------------------------------------------------------------------|----------------------------------------------------------|------|-------|------------------------------|------------------------|
| <i>Sox7</i> <sup>+/-</sup> × <i>Sox7</i> <sup>+/-</sup>                         | <i>Sox7</i> <sup>-/-</sup>                               | 0    | 33    | 1/4                          | 7.5 × 10 <sup>-5</sup> |
| <i>Sox7</i> <sup>CKO/+</sup> ; <i>Tie2-Cre</i> × <i>Sox7</i> <sup>CKO/CKO</sup> | <i>Sox7</i> <sup>CKO/CKO</sup> ; <i>Tie2-Cre</i>         | 0    | 66    | 1/4                          | 5.7 × 10 <sup>-9</sup> |
| <i>Sox7</i> <sup>+/-</sup> × <i>Sox17</i> <sup>+/-</sup>                        | <i>Sox7</i> <sup>+/-</sup> ; <i>Sox17</i> <sup>+/-</sup> | 1    | 51    | 1/4                          | 7.2 × 10 <sup>-6</sup> |

**B**

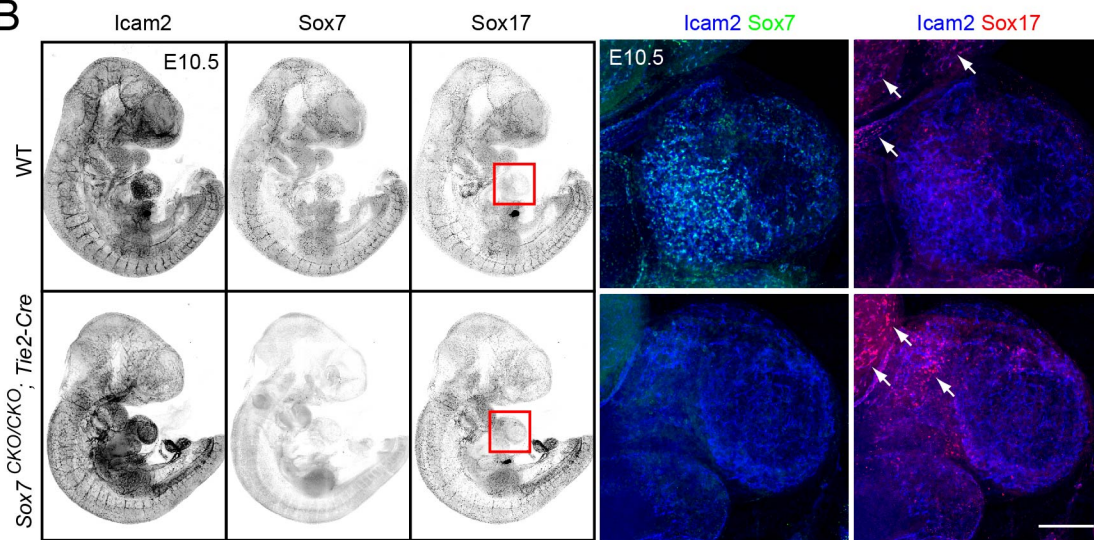

**C**

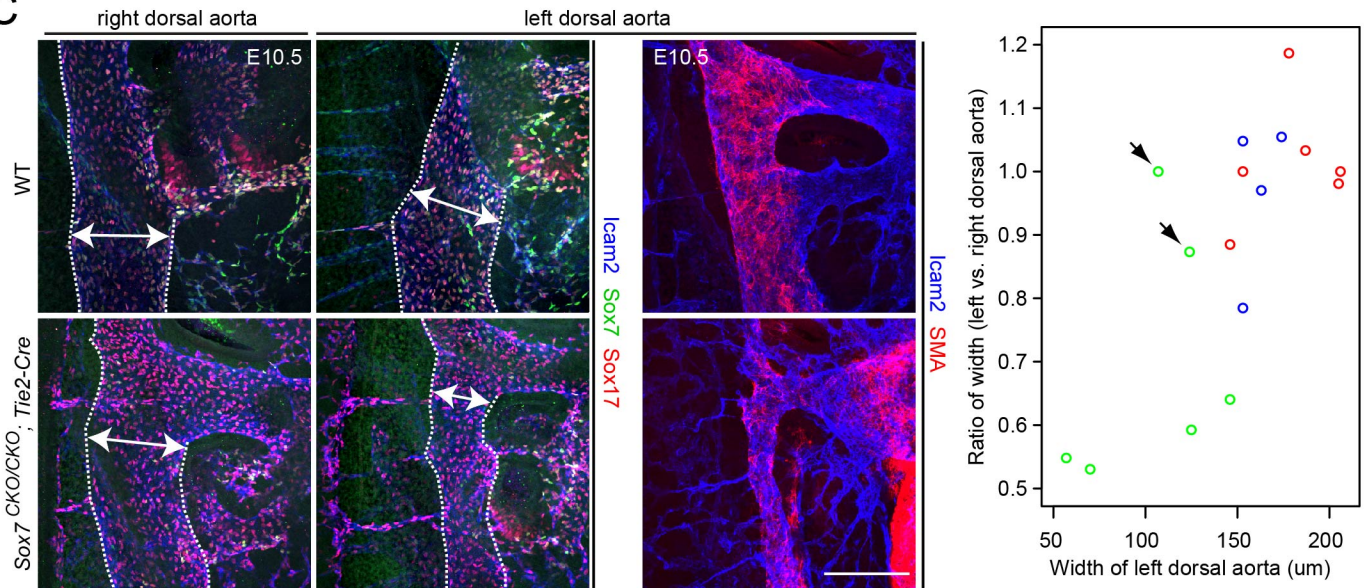

Supplement: pone.0143650.s003.pdf [file pone.0143650.s003.pdf]
