# Supplementary material for: Sox7, Sox17, and Sox18 Cooperatively Regulate Vascular Development in the Mouse Retina
Source: PubMed Central journal article supplement (PMC4667919; doi:10.1371/journal.pone.0143650), 2015-12-02
Supplement: pone.0143650.s004.pdf [file pone.0143650.s004.pdf]

**A**  $Sox17^{CKO/+}; Sox18^{+/-}; PDGFB-CreER$      $Sox17^{CKO/+}; Sox18^{-/-}; PDGFB-CreER$      $Sox17^{CKO/CKO}; Sox18^{-/-}; PDGFB-CreER$

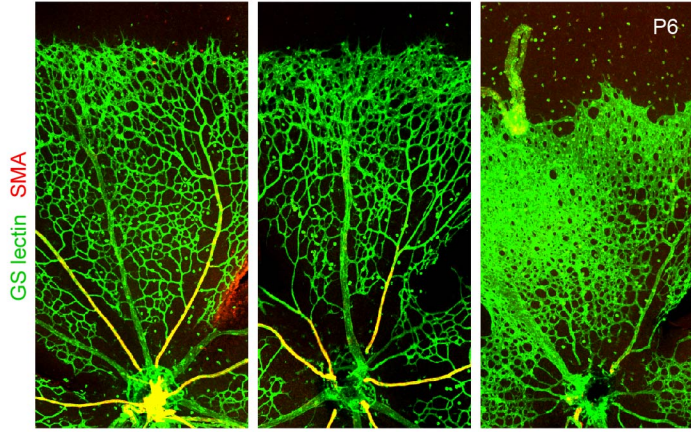

**B**  $Sox18^{+/-}$      $Sox17^{CKO/+}; Sox18^{-/-}; PDGFB-CreER$      $Sox17^{CKO/-}; Sox18^{+/-}; PDGFB-CreER$

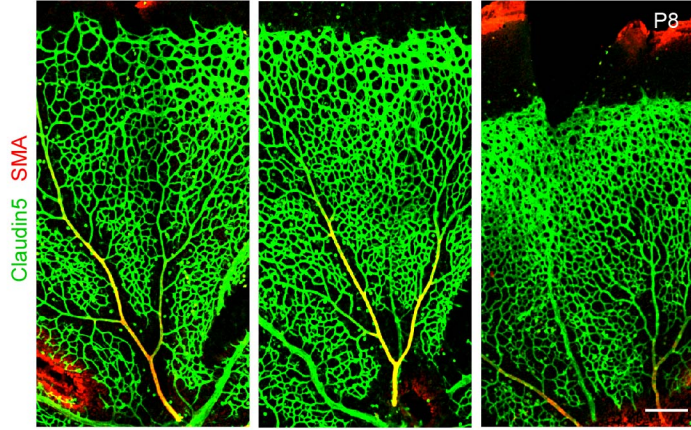

**D**  $Sox18^{+/-}$      $Sox17^{CKO/-}; Sox18^{+/-}; PDGFB-CreER$

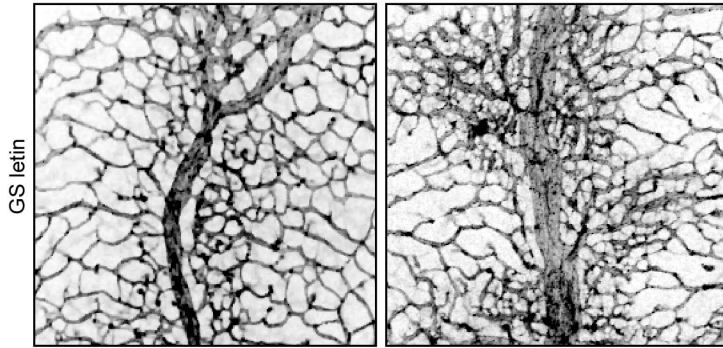

**C**  $Sox17^{CKO/+}; Sox18^{-/-}; PDGFB-CreER$      $Sox17^{CKO/-}; Sox18^{+/-}; PDGFB-CreER$      $Sox17^{CKO/-}; Sox18^{-/-}; PDGFB-CreER$

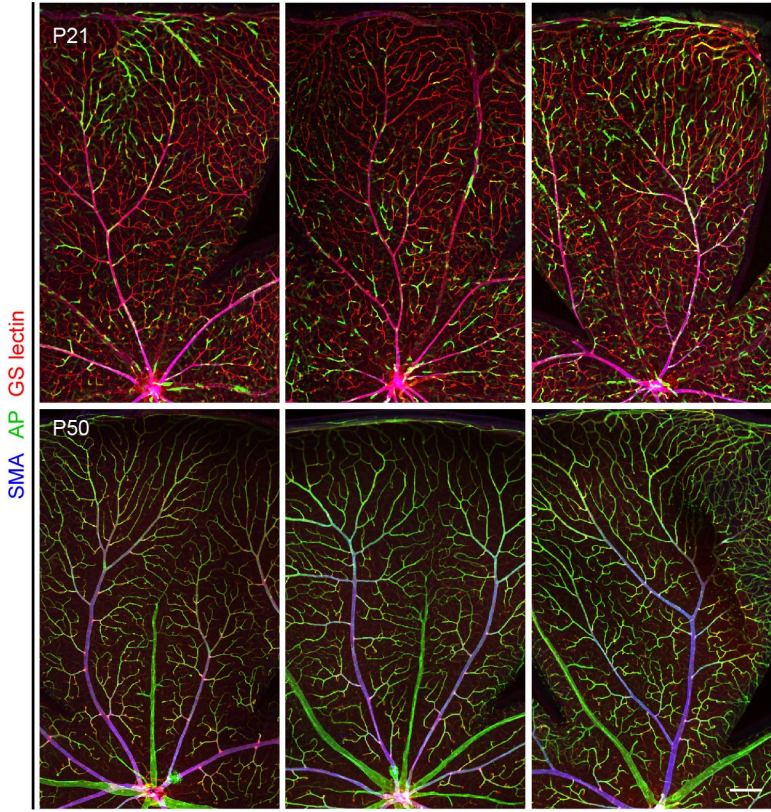

**E**  $Sox18^{+/-}$      $Sox17^{CKO/-}; Sox18^{+/-}; PDGFB-CreER$

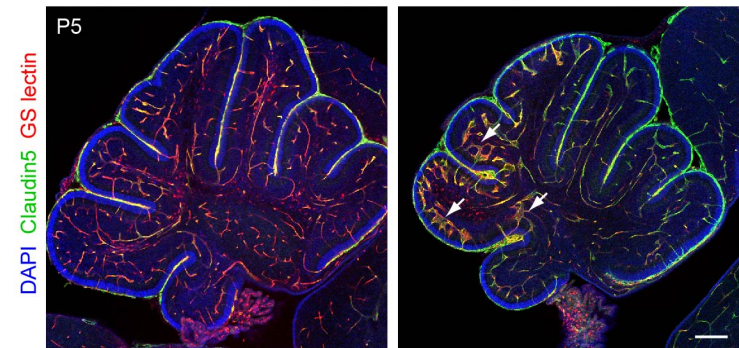

Zhou et al, Figure S4
