# Supplementary material for: Sox7, Sox17, and Sox18 Cooperatively Regulate Vascular Development in the Mouse Retina
Source: PubMed Central journal article supplement (PMC4667919; doi:10.1371/journal.pone.0143650), 2015-12-02

*Hprt<sup>LSL-tdTomato</sup>; PDGFB-CreER*  
(tamoxifen at P21, P23, P25)

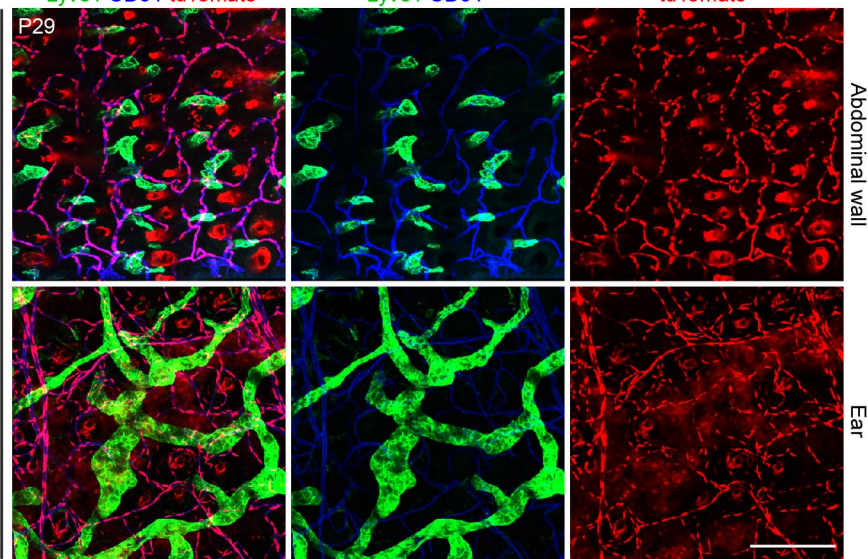

Supplement: pone.0143650.s006.pdf [file pone.0143650.s006.pdf]
